# Supplementary material for: Videoconferencing Software Options for Telemedicine: A Review for Movement Disorder Neurologists
Source: Frontiers journal article supplement (doi:10.3389/fneur.2021.745917), 2021-10-11
Supplement: Data_Sheet_1.PDF [file Data_Sheet_1.PDF]

**Supplementary figure 1**

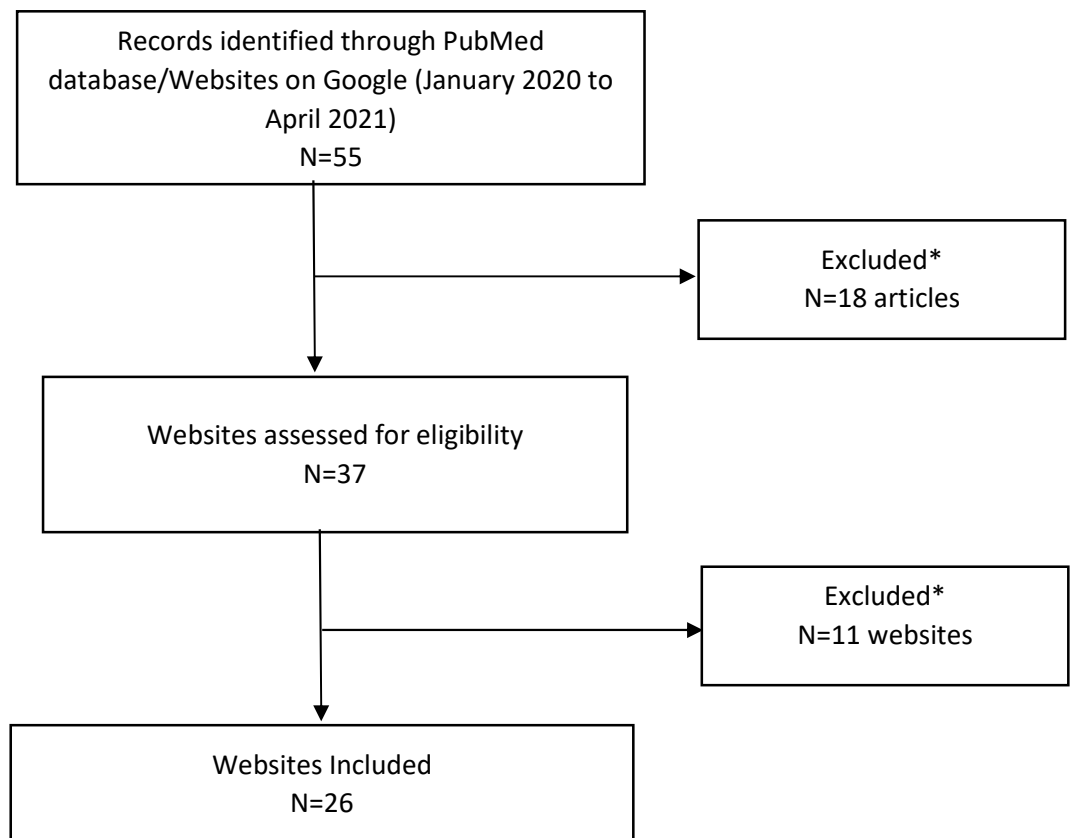

Figure 1-Prisma flow diagram for identification of relevant studies/websites. \*Reasons for exclusion: non-matched inclusion criteria.
